## P6191

### Proprotein convertase subtilisin/kexin type 9 (PCSK9) plasma levels are associated with the metabolic syndrome in patients with stable coronary artery disease

C. Caselli<sup>1</sup>, R. Ragusa<sup>1</sup>, S. Del Turco<sup>1</sup>, G. Basta<sup>1</sup>, A. Saraste<sup>2</sup>, J. Knuuti<sup>2</sup>, R. De Caterina<sup>3</sup>, D. Neglia<sup>4</sup><sup>1</sup>Institute of Clinical Physiology (IFC), Pisa, Italy; <sup>2</sup>University of Turku, Turku, Finland; <sup>3</sup>University Hospital of Pisa, Pisa, Italy; <sup>4</sup>Fondazione Toscana Gabriele Monasterio, Pisa, Italy

On behalf of EVINCI study

**Funding Acknowledgement:** AMGEN grant, EU FP7-CP-FP506 2007 project (grant agreement no. 222915)

**Background:** PCSK9 is a key regulator of serum LDL-cholesterol levels. The relation of PCSK9 with other components of cardiovascular and coronary artery disease (CAD) risk is still debated.

**Purpose:** To evaluate the association of PCSK9 plasma levels with cardiovascular and coronary risk profile, in patients with symptoms of suspected stable CAD enrolled in the EVINCI study.

**Methods:** PCSK9 was measured in 522 patients (60.4±8.8 years, 318 males) with symptoms of stable CAD. Individual risk was characterized by clinical and bio-humoral variables, including lipid/glucose/inflammatory profiles. Obstructive CAD was firstly ruled-in by multimodality non-invasive imaging and, subsequently, assessed by invasive coronary angiography.

**Results:** Patients were divided into groups according to PCSK9 quartiles: I (<138 ng/mL), II-III (138–264 ng/mL), and IV (>264 ng/mL) (Table). The

prevalence of obstructive CAD at invasive angiography and statin treatment did not differ among groups. Compared with patients in quartile IV, patients in quartile I, had a higher prevalence of metabolic syndrome and higher values of body mass index. Among biomarkers, all cholesterol lipoproteins levels progressively increased from quartile I to IV, while insulin and HOMA index values decreased (Table). At multivariable analyses adjusted for medical treatment, the only clinical or bio-humoral variables independently associated with PCSK9 levels were presence of the metabolic syndrome (Coeff. –0.195, SE 0.05, p<0.0001) and HDL cholesterol levels (Coeff. 0.444, SE 0.06, p<0.0001), respectively.

**Conclusion:** In patients with stable CAD, low plasma levels of PCSK9 are associated with the prevalence of metabolic syndrome and its individual components, including, in particular, HDL cholesterol.

Table 1

| Clinical Variables     | Quartile I           | Quartile II–III         | Quartile IV          | Biomarkers               | Quartile I           | Quartile II–III         | Quartile IV          |
|------------------------|----------------------|-------------------------|----------------------|--------------------------|----------------------|-------------------------|----------------------|
|                        | <138 ng/L<br>(n=130) | 138–264 ng/L<br>(n=261) | >264 ng/L<br>(n=131) |                          | <138 ng/L<br>(n=130) | 138–264 ng/L<br>(n=261) | >264 ng/L<br>(n=131) |
| Age, years             | 61±9                 | 60±9                    | 61±8                 | Glucose, mg/dL           | 110±30               | 117±41                  | 109±29               |
| Male gender            | 86 (66)              | 161 (62)                | 71 (55)              | Insulin, mU/l/mL         | 13.3±12.5*           | 11.3±10.1               | 10.3±10.1            |
| Family history         | 38 (29) <sup>#</sup> | 86 (33)                 | 58 (44)              | HOMA index               | 3.9±4.5*             | 3.5±4.1                 | 2.9±3.3              |
| Hypertension           | 78 (60)              | 164 (63)                | 88 (67)              | Tryglicerides, mg/dL     | 128±86               | 128±87                  | 118±68               |
| Hypercholesterolemia   | 72 (55)              | 158 (61)                | 81 (62)              | Total cholesterol, mg/dL | 171±43*              | 181±45                  | 203±55               |
| Diabetes mellitus      | 43 (33)              | 91 (35)                 | 37 (28)              | LDL, mg/dL               | 99±36*               | 104±38                  | 119±45               |
| Metabolic Syndrome     | 45 (35) <sup>#</sup> | 72 (28)                 | 19 (15)              | HDL, mg/dL               | 46±13*               | 52±15                   | 61±19                |
| BMI, kg/m <sup>2</sup> | 28.02±4.00*          | 28.03±4.25              | 26.95±4.56           | Total/HDL cholesterol    | 3.8±1.2*             | 3.7±1.2                 | 3.5±1.1              |
| Significant CAD at ICA | 18 (14)              | 46 (18)                 | 24 (18)              | hs-CRP, mg/dL            | 0.41±0.61            | 0.39±1.38               | 0.41±0.83            |
| Statins treatment      | 68 (52)              | 143 (55)                | 58 (44)              | Interleukin 6, ng/L      | 1.60±2.75            | 1.30±2.49               | 1.30±1.68            |

Chi square test: <sup>#</sup>p<0.05. ANOVA: I vs. IV Quartile: \*p<0.05.
